# Supplementary material for: Development of a Gradient HPLC Method for the Simultaneous Determination of Sotalol and Sorbate in Oral Liquid Preparations Using Solid Core Stationary Phase
Source: Hindawi journal article supplement (doi:10.1155/2015/806736), 2015-01-01
Supplement: f1 [file 806736.f1.pdf]

Supplement. Pharmaceutical products containing sotalol registered in EU and selected non-EU countries [3]

|                 | 40 mg<br>tablets | 80 mg<br>tablets | 120 mg<br>tablets | 160 mg<br>tablets | 200 mg<br>tablets | 240 mg<br>tablets | Solution<br>for<br>injection<br>10 mg/mL | Solution<br>for<br>injection<br>15 mg/mL | Oral<br>liquid<br>solution |
|-----------------|------------------|------------------|-------------------|-------------------|-------------------|-------------------|------------------------------------------|------------------------------------------|----------------------------|
| <u>EU</u>       |                  |                  |                   |                   |                   |                   |                                          |                                          |                            |
| Austria         |                  | •                |                   | •                 |                   |                   |                                          |                                          |                            |
| Belgium         |                  | •                |                   | •                 |                   |                   |                                          |                                          |                            |
| Bulgaria        |                  | •                |                   | •                 |                   |                   |                                          |                                          |                            |
| Croatia         |                  | •                |                   |                   |                   |                   |                                          |                                          |                            |
| Cyprus          |                  | •                |                   |                   |                   |                   |                                          |                                          |                            |
| Czech Republic  |                  | •                |                   | •                 |                   |                   |                                          |                                          |                            |
| Denmark         | •                | •                |                   | •                 |                   |                   |                                          |                                          |                            |
| Estonia         |                  | •                |                   |                   |                   |                   |                                          |                                          |                            |
| Finland         |                  | •                |                   | •                 |                   |                   |                                          |                                          |                            |
| France          |                  | •                |                   | •                 |                   |                   |                                          |                                          |                            |
| Germany         | •                | •                |                   | •                 |                   |                   | •                                        |                                          |                            |
| Greece          |                  | •                |                   | •                 |                   |                   |                                          |                                          |                            |
| Hungary         |                  | •                |                   | •                 |                   |                   |                                          |                                          |                            |
| Ireland         |                  | •                |                   | •                 |                   |                   |                                          |                                          |                            |
| Italy           |                  | •                |                   | •                 |                   |                   |                                          |                                          |                            |
| Latvia          |                  | •                |                   | •                 |                   |                   |                                          |                                          |                            |
| Lithuania       |                  |                  |                   |                   |                   |                   |                                          |                                          |                            |
| Luxembourg      |                  |                  |                   | •                 |                   |                   |                                          |                                          |                            |
| Malta           |                  | •                |                   |                   |                   |                   |                                          |                                          |                            |
| Netherlands     | •                | •                |                   | •                 |                   |                   |                                          |                                          |                            |
| Poland          | •                | •                |                   | •                 |                   |                   | •                                        |                                          |                            |
| Portugal        |                  | •                |                   | •                 |                   |                   | •                                        |                                          |                            |
| Romania         |                  | •                |                   | •                 |                   |                   |                                          |                                          |                            |
| Slovak Republic |                  |                  |                   |                   |                   |                   |                                          |                                          |                            |
| Slovenia        |                  | •                |                   |                   |                   |                   |                                          |                                          |                            |
| Spain           |                  | •                |                   |                   |                   |                   |                                          |                                          |                            |
| Sweden          | •                | •                |                   | •                 |                   |                   |                                          |                                          |                            |
| UK              | •                | •                |                   | •                 | •                 |                   |                                          |                                          |                            |
| <u>Non-EU</u>   |                  |                  |                   |                   |                   |                   |                                          |                                          |                            |
| Australia       |                  | •                |                   | •                 |                   |                   | •                                        |                                          |                            |
| Canada          |                  | •                |                   | •                 |                   |                   |                                          |                                          |                            |
| USA             |                  | •                | •                 | •                 |                   | •                 |                                          | •                                        |                            |
